# Supplementary material
Source: PubMed Central journal article supplement (PMC5580027)
Supplement: NIHMS895449-supplement-Supplemental_Material.pdf [file NIHMS895449-supplement-Supplemental_Material.pdf]

**Coronary Artery Calcium Improves Risk Assessment in Adults with a Family History of Premature Coronary Heart Disease: Results from MESA**

**Supplementary Document**

**Jaideep Patel, MD<sup>1,2</sup>; Mahmoud Al Rifai, MD, MPH<sup>1</sup>;  
Michael J. Blaha, MD, MPH<sup>1</sup>; Matthew J. Budoff, MD<sup>3</sup>;  
Wendy S. Post, MD, MS<sup>1</sup>; Joseph F. Polak, MD, MPH<sup>4</sup>;  
David A. Bluemke, MD, PhD<sup>5</sup>; Maren T. Scheuner, MD, MPH<sup>6,7</sup>;  
Richard A. Kronmal, PhD<sup>8</sup>; Roger S. Blumenthal, MD<sup>1</sup>;  
Khurram Nasir, MD, MPH<sup>1,9,10</sup>;  
John W. McEvoy, MB BCh BAO, MHS<sup>1,11</sup>**

**Patel et al: Subclinical CAD and Family History of CHD.**

<sup>1</sup>Johns Hopkins Ciccarone Center for the Prevention of Heart Disease, Baltimore, MD,

<sup>2</sup>Division of Internal Medicine, Virginia Commonwealth University Medical Center, Richmond, VA,

<sup>3</sup>Division of Cardiology, Los Angeles Biomedical Research Institute at Harbor-UCLA, Torrance, CA,

<sup>4</sup>Department of Radiology Cardiovascular Center, Tufts Medical Center, Boston, MA,

<sup>5</sup>Radiology and Imaging Sciences, National Institutes of Health Clinical Center, Bethesda, MD,

<sup>6</sup>Veterans Administration, Greater Los Angeles Healthcare System, Los Angeles, CA,

<sup>7</sup>Department of Medicine, David Geffen School of Medicine at UCLA, Los Angeles, CA,

<sup>8</sup>Collaborative Health Studies Coordinating Center, University of Washington, Seattle, WA,

<sup>9</sup>Center for Prevention and Wellness Research, Baptist Health Medical Group, Miami Beach, FL

<sup>10</sup>Department of Medicine, Herbert Wertheim College of Medicine, Florida International University, Miami, FL

<sup>11</sup>Division of Cardiology, Department of Medicine, Johns Hopkins Hospital, Baltimore, MD

**Corresponding author:** *John W McEvoy* MB BCh BAO MRCPI (jmcevoy1@jhmi.edu)  
Johns Hopkins Ciccarone Center for the Prevention of Heart Disease, Division of Cardiology, Johns Hopkins School of Medicine, 600 N. Wolfe St, Carnegie 568, Baltimore, MD 21287.

**Contents:**

**Supplemental Table 1:** Crude event rates (per 1000 person-years) according to race/ethnic group stratified by a family history of premature CHD status.

**Supplemental Table 2:** Hard ASCVD Events and Cox proportional hazards regression examining relation of hard CHD events with CAC categories and CIMT quartiles, stratified by FH of premature CHD.

**Supplemental Table 3:** Hard CHD Events and Cox proportional hazards regression examining relation of hard ASCVD events with CAC categories and CIMT quartiles, stratified by FH of premature CHD.

**Supplemental Table 4:** Cox proportional hazards regression examining relation of hard ASCVD events with CAC and CIMT, stratified by any family history of CHD status.

**Supplemental Table 5:** Cox proportional hazards regression examining relation of hard CHD events with CAC and CIMT, stratified by any family history of CHD status.

**Supplemental Figure 1a:** Receiver operating characteristic curves showing area under the curve for incident hard ASCVD among those without a family history of premature CHD.

**Supplemental Figure 1b:** Receiver operating characteristic curves showing area under the curve for incident hard CHD among those without a family history of premature CHD.

**Supplemental Table 1:** Crude event rates (per 1000 person-years) according to race/ethnic group stratified by a family history of premature CHD status.

|                 | Hard ASCVD  |             |         | Hard CHD    |             |         |
|-----------------|-------------|-------------|---------|-------------|-------------|---------|
|                 | Negative FH | Positive FH | p-value | Negative FH | Positive FH | p-value |
| <b>White</b>    | 6.99        | 7.12        | 0.91    | 4.20        | 5.18        | 0.34    |
| <b>Chinese</b>  | 3.44        | 5.62        | 0.49    | 2.38        | 2.81        | 0.79    |
| <b>Black</b>    | 4.86        | 9.80        | 0.002   | 3.14        | 5.35        | 0.06    |
| <b>Hispanic</b> | 7.02        | 10.85       | 0.06    | 4.47        | 6.87        | 0.13    |

FH – family history of premature coronary heart disease

CHD – coronary heart disease

ASCVD – atherosclerotic cardiovascular disease

**Supplemental Table 2: Hard ASCVD Events and Cox proportional hazards regression examining relation of hard ASCVD events with CAC and CIMT, stratified by FH of premature CHD.**

|                                     | Cox Proportional Hazard Ratios |                           | Number of Hard ASCVD Events |                        |
|-------------------------------------|--------------------------------|---------------------------|-----------------------------|------------------------|
|                                     | Negative FH<br>(n= 4,863 )     | Positive FH<br>(n= 1,262) | Negative FH<br>(n=278)      | Positive FH<br>(n=104) |
| <b>CAC 0</b>                        | 1 (ref)                        | 1 (ref)                   | 60                          | 25                     |
| <b>CAC 1-99</b>                     | 1.74 (1.21-2.50)               | 1.64 (0.94-2.87)          | 72                          | 30                     |
| <b>CAC 100-399</b>                  | 2.77 (1.90-4.05)               | 2.45 (1.31-4.58)          | 76                          | 24                     |
| <b>CAC ≥400</b>                     | 3.22 (2.15-4.84)               | 2.80 (1.44-5.43)          | 70                          | 25                     |
| p-value for interaction             | 0.28                           |                           |                             |                        |
| <b>ln (CAC+1)</b>                   | 1.19 (1.13-1.26)               | 1.17 (1.07-1.29)          |                             |                        |
| p-value for interaction             | 0.28                           |                           |                             |                        |
| <b>CIMT 1<sup>st</sup> Quartile</b> | 1 (ref)                        | 1 (ref)                   | 30                          | 15                     |
| <b>CIMT 2<sup>nd</sup> Quartile</b> | 1.35 (0.86-2.10)               | 0.80 (0.41-1.59)          | 59                          | 22                     |
| <b>CIMT 3<sup>rd</sup> Quartile</b> | 1.12 (0.72-1.77)               | 1.08 (0.56-2.06)          | 69                          | 29                     |
| <b>CIMT 4<sup>th</sup> Quartile</b> | 1.45 (0.93-2.26)               | 0.93 (0.48-1.82)          | 120                         | 38                     |
| p-value for interaction             | 0.29                           |                           |                             |                        |
| <b>Continuous CIMT</b>              | 1.53 (0.82-2.87)               | 0.89 (0.32-2.49)          |                             |                        |
| p-value for interaction             | 0.21                           |                           |                             |                        |

Adjusted for age, gender, race, MESA site, cigarette smoking, hypertension, diabetes, BMI, LDL-C, HDL-C, cholesterol lowering medications. Continuous CAC units are log-transformed Agatston Units, continuous CIMT units are per millimeter change in thickness.

ASCVD – atherosclerotic cardiovascular disease

FH – family history of premature coronary heart disease

CHD – coronary heart disease

CAC – coronary artery calcium

CIMT – carotid intima-media thickness

BMI – body mass index

LDL-C – low density lipoprotein-cholesterol

HDL-C - high density lipoprotein-cholesterol

**Supplemental Table 3: Hard CHD Events and Cox proportional hazards regression examining relation of hard CHD events with CAC and CIMT, stratified by FH of premature CHD.**

|                                     | Cox Proportional Hazard Ratios |                           | Number of Hard CHD Events |                       |
|-------------------------------------|--------------------------------|---------------------------|---------------------------|-----------------------|
|                                     | Negative FH<br>(n= 4,863 )     | Positive FH<br>(n= 1,262) | Negative FH<br>(n=176)    | Positive FH<br>(n=67) |
| <b>CAC 0</b>                        | 1 (ref)                        | 1 (ref)                   | 30                        | 13                    |
| <b>CAC 1-99</b>                     | 2.35 (1.46-3.78)               | 1.93 (0.91-4.10)          | 47                        | 18                    |
| <b>CAC 100-399</b>                  | 3.54 (2.14-5.85)               | 3.52 (1.58-7.84)          | 48                        | 18                    |
| <b>CAC ≥400</b>                     | 4.87 (2.88-8.24)               | 3.85 (1.65-9.02)          | 51                        | 18                    |
| p-value for interaction             | 0.49                           |                           |                           |                       |
| <b>ln (CAC+1)</b>                   | 1.25 (1.17-1.35)               | 1.22 (1.09-1.37)          |                           |                       |
| p-value for interaction             | 0.39                           |                           |                           |                       |
| <b>CIMT 1<sup>st</sup> Quartile</b> | 1 (ref)                        | 1 (ref)                   | 21                        | 8                     |
| <b>CIMT 2<sup>nd</sup> Quartile</b> | 1.35 (0.79-2.31)               | 1.23 (0.51-2.93)          | 41                        | 17                    |
| <b>CIMT 3<sup>rd</sup> Quartile</b> | 0.82 (0.46-1.45)               | 1.11 (0.46-2.70)          | 34                        | 16                    |
| <b>CIMT 4<sup>th</sup> Quartile</b> | 1.32 (0.77-2.26)               | 1.28 (0.53-3.11)          | 80                        | 26                    |
| p-value for interaction             | 0.67                           |                           |                           |                       |
| <b>Continuous CIMT</b>              | 1.31 (0.59-2.91)               | 1.20 (0.35-4.13)          |                           |                       |
| p-value for interaction             | 0.60                           |                           |                           |                       |

Adjusted for age, gender, race, MESA site, cigarette smoking, hypertension, diabetes, BMI, LDL-C, HDL-C, cholesterol lowering medications. Continuous CAC units are log-transformed Agatston Units, continuous CIMT units are per millimeter change in thickness.

CHD – coronary heart disease

CAC – coronary artery calcium

CIMT – carotid intima-media thickness

FH – family history of premature coronary heart disease

BMI – body mass index

LDL-C – low density lipoprotein-cholesterol

HDL-C - high density lipoprotein-cholesterol

**Supplemental Table 4:** Cox proportional hazards regression examining relation of hard ASCVD events with CAC and CIMT, stratified by any family history of CHD (assessed at visit 1).

|                              | <b>No FH of CHD</b><br>(n= 2,586 ) | <b>Any FH of CHD</b><br>(n =2,761) |
|------------------------------|------------------------------------|------------------------------------|
| <b>CAC 0</b>                 | 1 (ref group)                      | 1 (ref group)                      |
| <b>CAC 1-99</b>              | 1.65 (1.10-2.46)                   | 1.83 (1.20-2.79)                   |
| <b>CAC 100-399</b>           | 2.33 (1.49-3.63)                   | 2.92 (1.86-4.57)                   |
| <b>CAC ≥400</b>              | 2.85 (1.75-4.6)                    | 3.59 (2.23-5.76)                   |
| p-value for interaction      | 0.93                               |                                    |
| <b>CIMT 1<sup>st</sup> Q</b> | 1 (ref group)                      | 1 (ref group)                      |
| <b>CIMT 2<sup>nd</sup> Q</b> | 1.10 (0.64- 1.90)                  | 1.13 (0.70-1.81)                   |
| <b>CIMT 3<sup>rd</sup> Q</b> | 1.28 (0.76-2.16)                   | 1.05 (0.65-1.70)                   |
| <b>CIMT 4<sup>th</sup> Q</b> | 1.42 (0.84-2.39)                   | 1.09 (0.67-1.76)                   |
| p-value for interaction      | 0.10                               |                                    |

Adjusted for age, gender, race, MESA site, cigarette-smoking, hypertension, diabetes, BMI, LDL-C, HDL-C, cholesterol lowering medications.

ASCVD – atherosclerotic cardiovascular disease

CAC – coronary artery calcium

CIMT – carotid intima-media thickness

CHD – coronary heart disease

FH – any family history of coronary heart disease

BMI – body mass index

LDL-C – low density lipoprotein-cholesterol

HDL-C - high density lipoprotein-cholesterol

**Supplemental Table 5:** Cox proportional hazards regression examining relation of hard CHD events with CAC and CIMT, stratified by any family history of CHD (assessed at visit 1).

|                              | <b>No FH of CHD</b><br>(n= 3,620 ) | <b>Any FH of CHD</b><br>(n = 2,686) |
|------------------------------|------------------------------------|-------------------------------------|
| <b>CAC 0</b>                 | 1 (ref group)                      | 1 (ref group)                       |
| <b>CAC 1-99</b>              | 2.16 (1.24-3.78)                   | 2.30 (1.30-4.06)                    |
| <b>CAC 100-399</b>           | 3.19 (1.74-5.86)                   | 4.10 (2.28-7.37)                    |
| <b>CAC ≥400</b>              | 4.63 (2.43-8.81)                   | 5.31 (2.86-9.85)                    |
| p-value for interaction      | 0.86                               |                                     |
| <b>CIMT 1<sup>st</sup> Q</b> | 1 (ref group)                      | 1 (ref group)                       |
| <b>CIMT 2<sup>nd</sup> Q</b> | 1.26 (0.63-2.52)                   | 1.32 (0.73-2.38)                    |
| <b>CIMT 3<sup>rd</sup> Q</b> | 0.98 (0.49-1.98)                   | 1.08 (0.59-1.99)                    |
| <b>CIMT 4<sup>th</sup> Q</b> | 1.48 (0.75-2.93)                   | 1.15 (0.62-2.11)                    |
| p-value for interaction      | 0.19                               |                                     |

Adjusted for age, gender, race, MESA site, cigarette-smoking, hypertension, diabetes, BMI, LDL-C, HDL-C, cholesterol lowering medications.

CHD – coronary heart disease

CAC – coronary artery calcium

CIMT – carotid intima-media thickness

FH – any family history of coronary heart disease

BMI – body mass index

LDL-C – low density lipoprotein-cholesterol

HDL-C - high density lipoprotein-cholesterol

**Supplemental Figure 1a:** Receiver operating characteristic curves showing area under the curve for incident hard ASCVD among those without a family history of premature CHD\*.

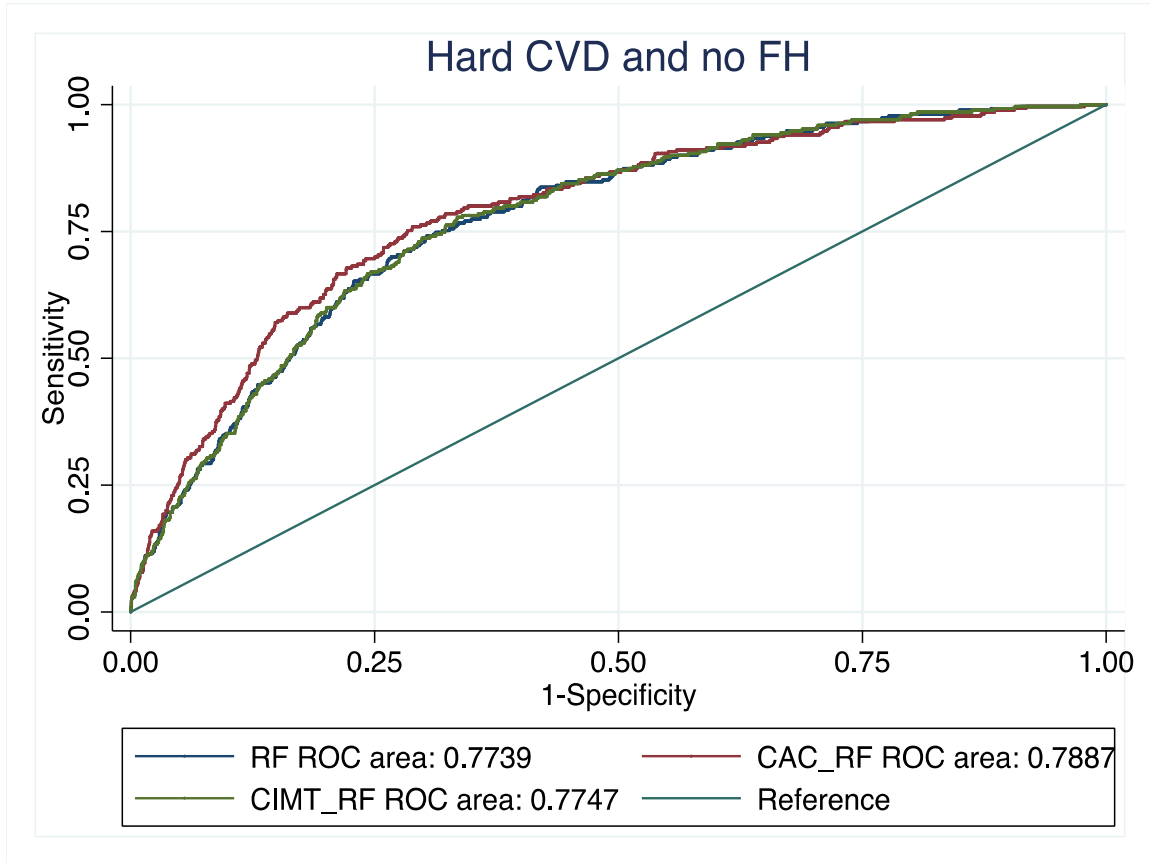

ASCVD – atherosclerotic cardiovascular disease

FH – family history of premature coronary heart disease

CAC – coronary artery calcium

CIMT – carotid intima-media thickness

\*CIMT and CAC were modelled continuously



**Supplemental Figure 1b:** Receiver operating characteristic curves showing area under the curve for incident hard CHD among those without a family history of premature CHD\*.

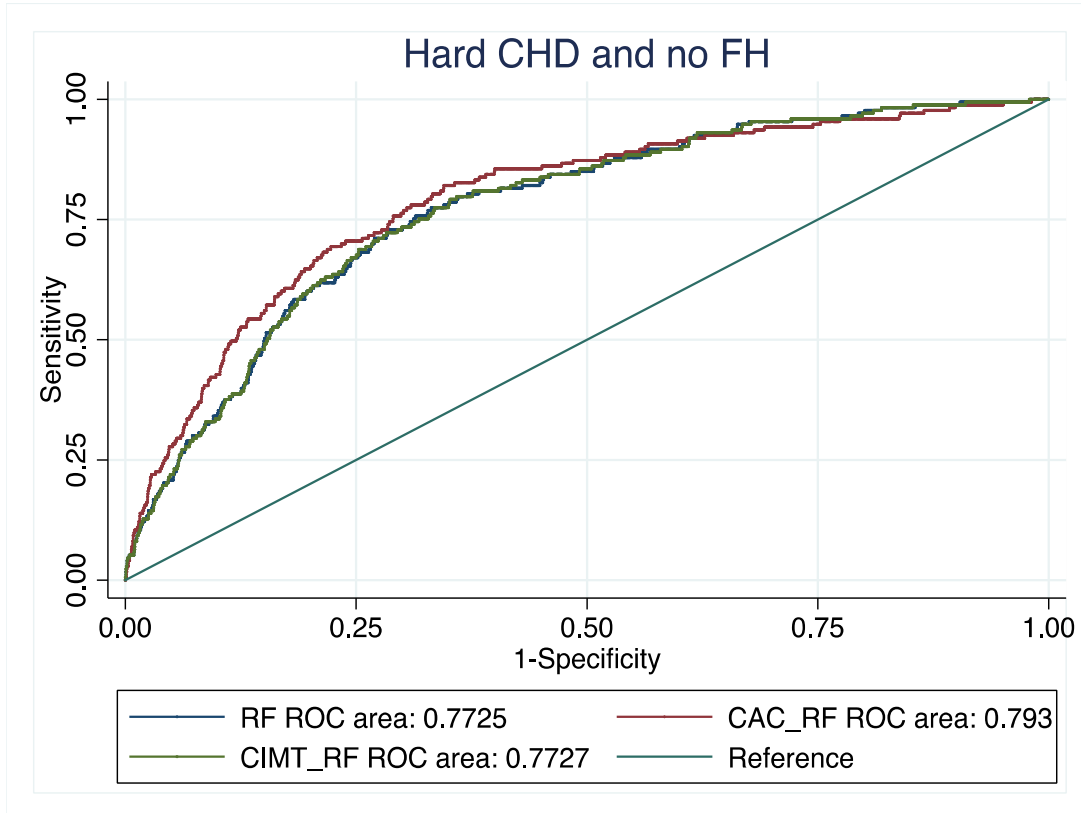

CHD – coronary heart disease

FH – family history of premature coronary heart disease

CAC – coronary artery calcium

CIMT – carotid intima-media thickness

\*CIMT and CAC were modelled continuously
